# Supplementary material
Source: Springer Nature journal article supplement (https://www.springermedizin.de/resource/supplementary/12888_2011_1205_MOESM4_ESM.pdf/9480648)

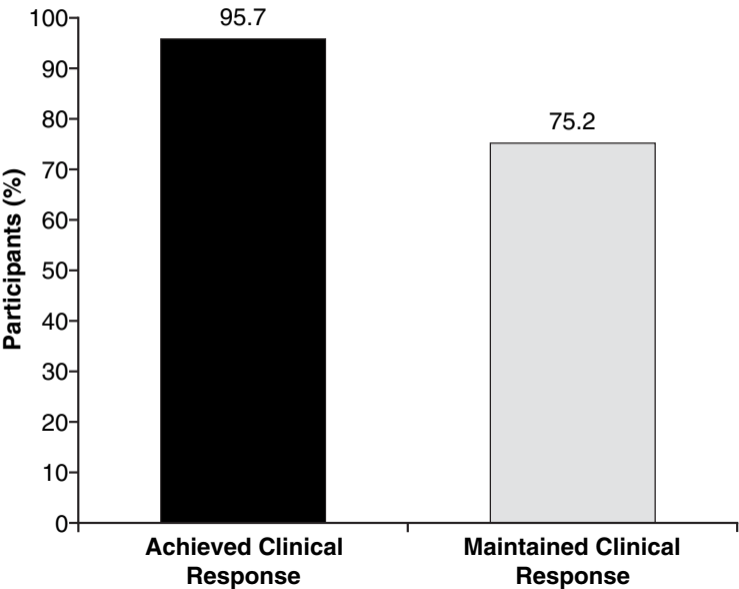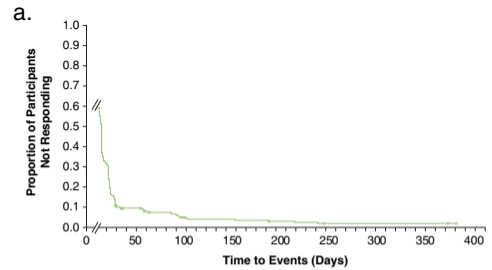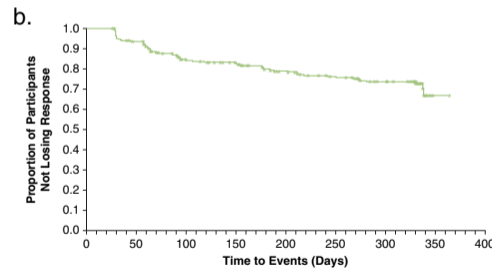

Supplement: MOESM4 [file 9480648]
